# Supplementary material
Source: publisher figshare collection journal article supplement (https://gsajournals.figshare.com/ndownloader/files/12389012)
Supplement: Supplementary file 1 [file 12389012]

## Sheet: Sheet1
Table S7: Quality analysis using QV scores following Koren et al. (2017) and Berlin et al. (2015).
Assembly	% aligned	% failed	Reads Processed	Total Bases (contigs > 500nt)	vcf variants	Berlin QV (phred)	Berlin QV (% id)	Total Bases Aligned	vcf variants	Koren QV	Koren QV (% id)
DBG2OLC	0.9351	0.0649	144831257	134109164	10496	41.0643	0.999922	133257695	10496	41.0367	0.999921
CANU	0.9413	0.0587	145679880	140720404	11469	40.8883	0.999918	139875100	11469	40.8621	0.999918
QM2x	0.941	0.059	145629212	140153080	11640	40.8065	0.999917	139311183	11640	40.7803	0.999916
Bionano	0.941	0.059	145628733	142817829	11588	40.9077	0.999919	139313503	11588	40.7998	0.999917
release 6.16	0.9441	0.0559	146054674	143726002	11413	41.0014	0.999921	142244263	11413	40.9563	0.99992
Berlin et al.	0.9405	0.0595	145560462	164080454	15811	40.161	0.999904	163322775	15811	40.1409	0.999903
Koren et al.	0.9463	0.0537	138512418	155249450	14732	40.2277	0.999905	154565770	14732	40.2085	0.999905
Only contigs containing at least 50 reads are included in all PBcR results.
if contigs filtered to >= 90kb then the assembly size and contig # is similar to Berlin et al but not the same.
